# Supplementary material for: The Role of Sentinel Lymph Node Biopsy in the Management of Merkel Cell Carcinoma: A Systematic Review and Meta-analysis
Source: PubMed Central journal article supplement — Plast Reconstr Surg Glob Open. 2024 Apr 19;12(4):e5760. doi: 10.1097/GOX.0000000000005760 (PMC11029990; doi:10.1097/gox.0000000000005760), 2024-04-19
Supplement: gox-12-e5760-s001.pdf [file gox-12-e5760-s001.pdf]

## Search Strategy

Searches last conducted 12/10/22

|    | <b>Embase</b> 1974 to 2022 October 10                                                                                                                             |        |
|----|-------------------------------------------------------------------------------------------------------------------------------------------------------------------|--------|
| 1  | exp sentinel lymph node biopsy/                                                                                                                                   | 19974  |
| 2  | exp sentinel lymph node/                                                                                                                                          | 11714  |
| 3  | exp lymph node metastasis/                                                                                                                                        | 160516 |
| 4  | ((sentinel nod* or lymph* nod* or lymphatic or SLN) adj3 (biops* or procedure* or evaluation* or status or metast* or positiv* or negativ* or mapping)).ti,ab,kw. | 162162 |
| 5  | SLNB.ti,ab,kw.                                                                                                                                                    | 4771   |
| 6  | 1 or 2 or 3 or 4 or 5                                                                                                                                             | 237541 |
| 7  | exp Merkel cell/                                                                                                                                                  | 1222   |
| 8  | exp merkel cell carcinoma/                                                                                                                                        | 2758   |
| 9  | exp Merkel cell tumor/                                                                                                                                            | 2758   |
| 10 | exp Merkel cell carcinoma cell line/                                                                                                                              | 123    |
| 11 | (merkel cell or merkle cell or merckel cell).ti,ab,kw.                                                                                                            | 6515   |
| 12 | MCC.ti,ab,kw.                                                                                                                                                     | 10849  |
| 13 | trabecular carcinoma.ti,ab,kw.                                                                                                                                    | 104    |
| 14 | cutaneous neuroendocrine carcinoma*.ti,ab,kw.                                                                                                                     | 188    |
| 15 | 7 or 8 or 9 or 10 or 11 or 12 or 13 or 14                                                                                                                         | 15976  |
| 16 | 6 and 15                                                                                                                                                          | 1339   |

|   | <b>Ovid MEDLINE(R) ALL</b> 1946 to October 10, 2022                 |        |
|---|---------------------------------------------------------------------|--------|
| 1 | exp Sentinel Lymph Node Biopsy/                                     | 12815  |
| 2 | exp Sentinel Lymph Node/                                            | 1862   |
| 3 | exp Lymphatic Metastasis/                                           | 96125  |
| 4 | ((sentinel nod* or lymph* nod* or lymphatic or SLN) adj3 (biops* or | 110395 |

|    |                                                                                               |        |
|----|-----------------------------------------------------------------------------------------------|--------|
|    | procedure* or evaluation* or status or metast* or positiv* or negativ* or mapping)).ti,ab,kw. |        |
| 5  | SLNB.ti,ab,kw.                                                                                | 2462   |
| 6  | 1 or 2 or 3 or 4 or 5                                                                         | 162352 |
| 7  | exp Merkel Cells/                                                                             | 379    |
| 8  | exp Carcinoma, Merkel Cell/                                                                   | 2986   |
| 9  | (merkel cell or merkle cell or merckel cell).ti,ab,kw.                                        | 4535   |
| 10 | MCC.ti,ab,kw.                                                                                 | 7424   |
| 11 | trabecular carcinoma.ti,ab,kw.                                                                | 77     |
| 12 | cutaneous neuroendocrine carcinoma*.ti,ab,kw.                                                 | 132    |
| 13 | 7 or 8 or 9 or 10 or 11 or 12                                                                 | 10757  |
| 14 | 6 and 13                                                                                      | 808    |

|   | <b>Web of Science Core Collection</b>                                                                                                                            |         |
|---|------------------------------------------------------------------------------------------------------------------------------------------------------------------|---------|
| 1 | TS=(("sentinel nod*" or "lymph* nod*" or lymphatic or SLN) NEAR/3 (biops* or procedure* or evaluation* or status or metast* or positiv* or negativ* or mapping)) | 114,710 |
| 2 | TS=SLNB                                                                                                                                                          | 2,276   |
| 3 | #1 or #2                                                                                                                                                         | 114,787 |
| 4 | TS=("merkel cell" or "merkle cell" or "merckel cell")                                                                                                            | 6,032   |
| 5 | TS=MCC                                                                                                                                                           | 14,011  |
| 6 | TS="trabecular carcinoma"                                                                                                                                        | 369     |
| 7 | TS="cutaneous neuroendocrine carcinoma*"                                                                                                                         | 158     |
| 8 | #4 OR #5 OR #6 OR #7                                                                                                                                             | 18,498  |
| 9 | #3 AND #8                                                                                                                                                        | 656     |

|  |                                                                             |  |
|--|-----------------------------------------------------------------------------|--|
|  | Interface - EBSCOhost Research Databases<br>Search Screen - Advanced Search |  |
|--|-----------------------------------------------------------------------------|--|

|     | Database - <b>CINAHL Plus with Full Text</b>                                                                                                                                                                                                                                                                                           |         |
|-----|----------------------------------------------------------------------------------------------------------------------------------------------------------------------------------------------------------------------------------------------------------------------------------------------------------------------------------------|---------|
| #   | Query                                                                                                                                                                                                                                                                                                                                  | Results |
| S12 | S5 AND S11                                                                                                                                                                                                                                                                                                                             | 102     |
| S11 | S6 OR S7 OR S8 OR S9 OR S10                                                                                                                                                                                                                                                                                                            | 1,651   |
| S10 | TI "cutaneous neuroendocrine carcinoma*" OR AB "cutaneous neuroendocrine carcinoma*"                                                                                                                                                                                                                                                   | 12      |
| S9  | TI "trabecular carcinoma" OR AB "trabecular carcinoma"                                                                                                                                                                                                                                                                                 | 1       |
| S8  | TI MCC OR AB MCC                                                                                                                                                                                                                                                                                                                       | 1,085   |
| S7  | TI ( (merkel cell or merkle cell or merckel cell) ) OR AB ( (merkel cell or merkle cell or merckel cell) )                                                                                                                                                                                                                             | 807     |
| S6  | (MH "Carcinoma, Merkel Cell")                                                                                                                                                                                                                                                                                                          | 138     |
| S5  | S1 OR S2 OR S3 OR S4                                                                                                                                                                                                                                                                                                                   | 17,152  |
| S4  | TI SLNB OR AB SLNB                                                                                                                                                                                                                                                                                                                     | 516     |
| S3  | TI ( ( ("sentinel nod*" or "lymph* nod*" or lymphatic or SLN) N3 (biops* or procedure* or evaluation* or status or metast* or positiv* or negativ* or mapping)) ) OR AB ( ( ("sentinel nod*" or "lymph* nod*" or lymphatic or SLN) N3 (biops* or procedure* or evaluation* or status or metast* or positiv* or negativ* or mapping)) ) | 16,077  |
| S2  | (MH "Sentinel Lymph Node")                                                                                                                                                                                                                                                                                                             | 174     |
| S1  | (MH "Sentinel Lymph Node Biopsy")                                                                                                                                                                                                                                                                                                      | 3,001   |

#### Cochrane Central

ID Search Hits

#1 MeSH descriptor: [Sentinel Lymph Node Biopsy] explode all trees 303

#2 MeSH descriptor: [Sentinel Lymph Node] explode all trees 49

#3 MeSH descriptor: [Lymphatic Metastasis] explode all trees 1920

#4 ( ("sentinel nod\*" or "lymph\* nod\*" or lymphatic or SLN) NEAR/3 (biops\* or procedure\* or evaluation\* or status or metast\* or positiv\* or negativ\* or mapping))  
2446

#5 SLNB 272

#6 {OR #1-#4} 2537

|     |                                                             |     |
|-----|-------------------------------------------------------------|-----|
| #7  | MeSH descriptor: [Merkel Cells] explode all trees           | 1   |
| #8  | MeSH descriptor: [Carcinoma, Merkel Cell] explode all trees | 22  |
| #9  | (merkel cell or merkle cell or merckel cell)                | 186 |
| #10 | MCC                                                         | 610 |
| #11 | {OR #7-#10}                                                 | 746 |
| #12 | #6 AND #11                                                  | 8   |
